# Supplementary material
Source: PubMed Central journal article supplement (PMC7163407)
Supplement: jamaotolaryngolheadnecksurg-146-355-s001.pdf [file jamaotolaryngolheadnecksurg-146-355-s001.pdf]

## Supplementary Online Content

Mattei A, Bertrand B, Jouve E, et al. Feasibility of first injection of autologous adipose tissue–derived stromal vascular fraction in human scarred vocal folds: a nonrandomized controlled trial. *JAMA Otolaryngol*. Published online February 13, 2020. doi:10.1001/jamaoto.2019.4328

**eMethods 1.** Biological Characterization of the Adipose-Derived Stromal Vascular Fraction

**eMethods 2.** Definition of Vocal Assessment’s Parameters

**eTable 1.** Characteristics of Adipose Tissue Harvest and Adipose-Derived Stromal Vascular Fraction

**eTable 2.** Changes in the Self-evaluation, Videolaryngostroboscopy, Perceptive, Acoustic, and Aerodynamic Analyses After Injection of Autologous Adipose-Derived Stromal Vascular Fraction Injection

**eTable 3.** Individual Patient Data of Vocal Assessments and Quality of Life

This supplementary material has been provided by the authors to give readers additional information about their work.

## **eMethods 1. Biological characterization of the Adipose-Derived Stromal Vascular Fraction**

Total viable nucleated cell recovery and cell viability were determined using the Nucleocounter NC100 instrument (ChemoMetec, Denmark). Cellular components within isolated Adipose-Derived Stromal Vascular Fraction (ADSVF) were identified by flow cytometry analysis (Beckman Navios instrument) according to the guidelines from the International Federation of Adipose Therapeutics and Science (IFATS) and International Society for Cellular Therapy (ISCT). A panel of markers including NucBlue as viability marker and fluorochrome-conjugated antibodies directed against cell surface antigens was used to characterize the different cell types present in the ADSVF (but without separating them before injection): CD14-FITC, CD90-FITC, CD146-PE, CD34-ECD, CD45-PC5. Corresponding isotype-matched control antibodies were used to determine the non-specific fluorescence. Debris, red blood cells and dead cells were excluded from the analysis. The frequency of Adipose-Derived Stem Cells (ADSC) was estimated using the Colony-Forming-Unit-Fibroblastic (CFU-F) clonogenic assay.

## **eMethods 2. Definition of vocal assessment's parameters**

The Signal to noise ratio quantifies the aperiodic portion of the voice signal (the higher the signal the better).

The Vocal range is the difference between the maximum frequency and the minimum frequency.

The Maximum Phonation Time (MPT) and the Oral AirFlow (OAF) both quantify the glottal air leakage (if the leakage is important, MPT should be short and OAF high).

The Estimated subglottic pressure at the phonatory threshold is the minimum subglottic pressure needed to initiate and sustain vocal folds vibration.

The Voice Handicap Index (VHI) is composed of 3 parts (E = emotional subscale, F = functional subscale, P = physical subscale), with lower scores indicating a better voice perception. Patients were considered as responders if they achieved the Minimal Clinically Important Difference (MCID) defined by Jacobson as a shift in the total VHI score of at least 18<sup>1</sup>.

SF36 is a generic quality-of-life scale consisting of 36 items describing eight dimensions (Physical Function, Social Function, Role limitations due to physical health problems, Role limitations due to emotional problems, Emotional Well-being, Vitality, Bodily Pain and General Health Perception<sup>2</sup>); and two summary measures: the Physical (PCS) and Mental (MCS) Component Summary scores<sup>3</sup>. Each dimension ranges from 0 to 100; the higher the score, the better the perceived state of health.

**eTable 1. Characteristics of adipose tissue harvest and Adipose-Derived Stromal Vascular Fraction**

| Patient n°  | Volume of adipose tissue harvested (ml) <sup>a</sup> | Volume of ADSVF injected in total (ml) | Number of ADSVF cells injected, after quality control (millions) | Viability (%) | Leukocytes (%) | Macrophages (%) | Endothelial cells (%) | Pericytes (%) | Stromal cells (ADSC) (%) | CFU-F (%)   |
|-------------|------------------------------------------------------|----------------------------------------|------------------------------------------------------------------|---------------|----------------|-----------------|-----------------------|---------------|--------------------------|-------------|
| 1           | 135                                                  | 1.00                                   | 13.60                                                            | 82.5          | 15.7           | 3.8             | 5.2                   | 32.2          | 43.1                     | 2.8         |
| 2           | 340                                                  | 0.90                                   | 12.16                                                            | 86.0          | 28.5           | 8.2             | 2.7                   | 8.3           | 52.3                     | 3.4         |
| 3           | 100                                                  | 1.25                                   | 2.63                                                             | 85.8          | 34.5           | 12.8            | 5.6                   | 9.5           | 37.7                     | 5.3         |
| 4           | 190                                                  | 1.00                                   | 7.20                                                             | 85.5          | 19.3           | 13.0            | 5.1                   | 37.1          | 25.5                     | 1.3         |
| 5           | 100                                                  | 1.00                                   | 10.30                                                            | 93.4          | 42.8           | 10.1            | 2.2                   | 6.0           | 38.8                     | 8.0         |
| 6           | 190                                                  | 1.00                                   | 6.48                                                             | 80.6          | 30.0           | 8.7             | 6.8                   | 21.8          | 32.7                     | 3.9         |
| 7           | 120                                                  | 1.00                                   | 2.23                                                             | 82.1          | 25.1           | 6.8             | 14.1                  | 26.5          | 27.7                     | 2.2         |
| 8           | 190                                                  | 1.00                                   | 7.80                                                             | 80.0          | 30.0           | 6.6             | 8.8                   | 17.6          | 37.0                     | 2.7         |
| Mean ± SD   | 171 ± 79                                             | 1.02 ± 0.10                            | 7.8 ± 4.1                                                        | 84.5 ± 4.3    | 28.2 ± 8.5     | 8.7 ± 3.1       | 6.3 ± 3.8             | 19.9 ± 11.6   | 36.8 ± 8.6               | 3.7 ± 2.1   |
| Median      | 163                                                  | 1.00                                   | 7.5                                                              | 84.0          | 29.3           | 8.5             | 5.4                   | 19.7          | 37.4                     | 3.1         |
| (min - max) | (100 - 340)                                          | (0.90 - 1.25)                          | (2.2 - 13.6)                                                     | (80.0 - 93.4) | (15.7 - 42.8)  | (3.8 - 13.0)    | (2.2 - 14.1)          | (6.0 - 37.1)  | (25.5 - 52.3)            | (1.3 - 8.0) |

<sup>a</sup> net volume, after removal of infiltration liquid

ADSVF: Adipose-Derived Stromal Vascular Fraction

ADSC: Adipose-Derived Stromal / Stem cells

**eTable 2. Changes in the self-evaluation, videolaryngostroboscopy, perceptive, acoustic and aerodynamic analyzes after injection of autologous ADSVF injection**

|                                              |                   | Baseline              | 1 month          | Change<br>(1 month-<br>baseline) | 6 months              | Change<br>(6 months-<br>baseline) | 12 months             | Change<br>(12 months-<br>baseline) |
|----------------------------------------------|-------------------|-----------------------|------------------|----------------------------------|-----------------------|-----------------------------------|-----------------------|------------------------------------|
| <b>Self Evaluation</b>                       |                   |                       |                  |                                  |                       |                                   |                       |                                    |
| <i>VHI</i><br>(0-120)                        | Mean ± SD         | 79.5 ± 14.3           | 56.0 ± 26.0      | -24.4 ± 20.5                     | 48.1 ± 29.9           | -31.4 ± 29.0                      | 39.4 ± 28.2           | -40.1 ± 21.5                       |
|                                              | Median<br>(range) | 74.0<br>(61 ; 107)    | 64.0<br>(5 ; 84) | -22.0<br>(-56 ; -1)              | 45.5<br>(12 ; 92)     | -44.5<br>(-62 ; 7)                | 37.0<br>(2 ; 80)      | -40.5<br>(-66 ; -9)                |
| <i>VHI Functional</i><br>(0-40)              | Mean ± SD         | 22.3 ± 5.8            | 16.9 ± 8.8       | -6.9 ± 7.1                       | 12.4 ± 8.6            | -9.9 ± 10.4                       | 10.1 ± 9.2            | -12.1 ± 7.8                        |
|                                              | Median<br>(range) | 24.0<br>(12 ; 30)     | 21.0<br>(0 ; 26) | -5.0<br>(-16 ; 1)                | 12.5<br>(2 ; 25)      | -11.0<br>(-22 ; 6)                | 6.5<br>(0 ; 26)       | -11.0<br>(-22 ; -4)                |
| <i>VHI Physical</i><br>(0-40)                | Mean ± SD         | 30.3 ± 4.0            | 20.0 ± 7.1       | -10.1 ± 8.7                      | 20.1 ± 11.1           | -10.1 ± 11.3                      | 16.1 ± 9.2            | -14.1 ± 8.3                        |
|                                              | Median<br>(range) | 30.0<br>(27 ; 39)     | 21.0<br>(5 ; 27) | -9.0<br>(-25 ; 0)                | 19.0<br>(4 ; 33)      | -14.5<br>(-26 ; 6)                | 16.0<br>(2 ; 28)      | -13.0<br>(-28 ; -3)                |
| <i>VHI Emotional</i><br>(0-40)               | Mean ± SD         | 27.0 ± 10.0           | 19.1 ± 11.7      | -7.4 ± 5.8                       | 15.6 ± 12.6           | -11.4 ± 10.1                      | 13.1 ± 10.7           | -13.9 ± 8.6                        |
|                                              | Median<br>(range) | 27.0<br>(15 ; 38)     | 22.0<br>(0 ; 35) | -8.0<br>(-15 ; -1)               | 16.5<br>(1 ; 40)      | -11.5<br>(-23 ; 3)                | 14.0<br>(0 ; 27)      | -12.0<br>(-27 ; 1)                 |
| <i>SF-36 - PCS</i><br>(0-100)                | Mean ± SD         | 51.6 ± 7.3            | /                | /                                | 52.6 ± 2.7            | 0.9 ± 8.0                         | 53.5 ± 4.2            | 1.1 ± 8.9                          |
|                                              | Median<br>(range) | 52.4<br>(38.5 ; 60.8) |                  |                                  | 52.8<br>(48.8 ; 57.4) | -0.1<br>(-7.2 ; 14.3)             | 55.6<br>(46.7 ; 57.8) | 1.8<br>(-10.6 ; 12.4)              |
| <i>SF-36 - MCS</i><br>(0-100)                | Mean ± SD         | 44.5 ± 13.4           | /                | /                                | 40.0 ± 12.1           | -3.7 ± 10.5                       | 46.3 ± 11.3           | 0.5 ± 12.4                         |
|                                              | Median<br>(range) | 50.4<br>(25.6 ; 59.5) |                  |                                  | 39.3<br>(26.4 ; 62.1) | -6.9<br>(-20.2 ; 10.6)            | 45.9<br>(35.0 ; 62.1) | 6.5<br>(-24.5 ; 10.1)              |
| <b>Vidéolaryngostroboscopie <sup>a</sup></b> |                   |                       |                  |                                  |                       |                                   |                       |                                    |
| <i>Glottal closure</i><br>(0-3)              | Mean ± SD         | 1.6 ± 0.9             | /                | /                                | /                     | /                                 | 1.0 ± 0.9             | -0.6 ± 1.6                         |
|                                              | Median<br>(range) | 2.0<br>(0.0 ; 3.0)    |                  |                                  |                       |                                   | 1.0<br>(0.0 ; 2.0)    | -1<br>(-3.0 ; 2.0)                 |
| <i>Regularity</i><br>(0-3)                   | Mean ± SD         | 1.2 ± 0.7             | /                | /                                | /                     | /                                 | 0.9 ± 0.8             | -0.3 ± 1.4                         |
|                                              | Median<br>(range) | 1.3<br>(0.5 ; 2.0)    |                  |                                  |                       |                                   | 1.0<br>(0.0 ; 2.0)    | 0.0<br>(-2.0 ; 1.5)                |

|                                    |                   |                      |                      |                       |                       |                      |                       |                      |
|------------------------------------|-------------------|----------------------|----------------------|-----------------------|-----------------------|----------------------|-----------------------|----------------------|
| <i>Vibration</i><br>(0-3)          | Mean ± SD         | 1.3 ± 0.5            | /                    | /                     | /                     | /                    | 0.9 ± 0.8             | -0.4 ± 1.2           |
|                                    | Median<br>(range) | 1.3<br>(0.5 ; 2.0)   |                      |                       |                       |                      | 0.8<br>(0.0 ; 2.0)    | -0.3<br>(-2.0 ; 1.5) |
| <b>Perceptive analysis</b>         |                   |                      |                      |                       |                       |                      |                       |                      |
| <i>Global grade</i><br>(0-3)       | Mean ± SD         | 2.1 ± 0.4            | /                    | /                     | 2.0 ± 0.5             | -0.1 ± 0.4           | 1.8 ± 1               | -0.4 ± 0.9           |
|                                    | Median<br>(range) | 2.0<br>(2.0 ; 3.0)   |                      |                       | 2.0<br>(1.0 ; 3.0)    | 0.0<br>(-1.0 ; 0.0)  | 2<br>(0.0 ; 3.0)      | 0.0<br>(-2.0 ; 1.0)  |
| <i>Roughness</i><br>(0-3)          | Mean ± SD         | 1.9 ± 0.6            | /                    | /                     | 1.5 ± 0.9             | -0.4 ± 0.7           | 1.4 ± 1.1             | -0.5 ± 0.8           |
|                                    | Median<br>(range) | 2.0<br>(1.0 ; 3.0)   |                      |                       | 1.5<br>(0.0 ; 3.0)    | 0.0<br>(-2.0 ; 0.0)  | 1.5<br>(0.0 ; 3.0)    | 0.0<br>(-2.0 ; 0.0)  |
| <i>Breathiness</i><br>(0-3)        | Mean ± SD         | 1.5 ± 1.1            | /                    | /                     | 1.6 ± 0.9             | 0.1 ± 0.4            | 1.5 ± 1.2             | 0.0 ± 0.5            |
|                                    | Median<br>(range) | 2.0<br>(0.0 ; 3.0)   |                      |                       | 2.0<br>(0.0 ; 3.0)    | 0<br>(0.0 ; 1.0)     | 1.5<br>(0.0 ; 3.0)    | 0.0<br>(-1.0 ; 1.0)  |
| <b>Acoustic analysis</b>           |                   |                      |                      |                       |                       |                      |                       |                      |
| <i>SNR</i><br>(dB)                 | Mean ± SD         | 15.2 ± 4.1           | 9.8 ± 3.9            | -0.7 ± 5.7            | 19.1 ± 2.6            | 3.9 ± 4.8            | 17.8 ± 1.5            | 2.6 ± 4.7            |
|                                    | Median<br>(range) | 15.9<br>(9.5 ; 21.3) | 13.4<br>(9.8 ; 19.7) | -0.3<br>(-11.5 ; 8.4) | 19.0<br>(15.8 ; 23.0) | 3.3<br>(-2.3 ; 11.2) | 17.9<br>(16.2 ; 21.1) | 3.7<br>(-4.6 ; 8.2)  |
| <i>Vocal range</i><br>(Hz)         | Mean ± SD         | 380 ± 111            | 458 ± 101            | 109 ± 181             | 420 ± 91              | 99 ± 157             | 379 ± 84              | -25 ± 158            |
|                                    | Median<br>(range) | 421<br>(209 ; 474)   | 456<br>(295 ; 593)   | 86<br>(-77 ; 384)     | 414<br>(316 ; 538)    | 107<br>(-61 ; 252)   | 375<br>(235 ; 518)    | -17<br>(-239 ; 160)  |
| <b>Aerodynamic analysis</b>        |                   |                      |                      |                       |                       |                      |                       |                      |
| <i>MPT</i><br>(s)                  | Mean ± SD         | 10.7 ± 6.2           | 10.3 ± 6.0           | -0.4 ± 4.9            | 8.6 ± 5.5             | -2.0 ± 3.6           | 10.6 ± 4.7            | 0.0 ± 4.4            |
|                                    | Median<br>(range) | 9.6<br>(3.1 ; 22.0)  | 10.4<br>(2.4 ; 21.0) | 1.0<br>(-8.1 ; 5.0)   | 7.6<br>(3.6 ; 19.4)   | -1.9<br>(-8.0 ; 3.4) | 9.1<br>(3.8 ; 19.0)   | 1.7<br>(-8.4 ; 3.4)  |
| <i>OAF</i><br>(cm <sup>3</sup> /s) | Mean ± SD         | 302 ± 112            | 298 ± 113            | -5 ± 153              | 344 ± 246             | 42 ± 169             | 282 ± 103             | -20.6 ± 82.3         |
|                                    | Median<br>(range) | 296<br>(149 ; 519)   | 270<br>(160 ; 497)   | 25<br>(-334 ; 178)    | 275<br>(108 ; 919)    | 44<br>(-164 ; 400)   | 326<br>(138 ; 418)    | -17<br>(-162 ; 89)   |
| <i>ESP</i><br>(hPa)                | Mean ± SD         | 8.0 ± 3.1            | 7.7 ± 2.2            | -0.2 ± 2.0            | 8.1 ± 4.0             | 0.3 ± 4.3            | 9.6 ± 4.6             | 2.1 ± 3.3            |
|                                    | Median<br>(range) | 7.7<br>(5.0 ; 13.0)  | 7.2<br>(5.1 ; 11.5)  | 0.1<br>(-2.9 ; 2.7)   | 7.5<br>(3.5 ; 16.5)   | 0.7<br>(-6.6 ; 5.3)  | 8.3<br>(5.0 ; 17.0)   | 2.7<br>(-2.7 ; 5.8)  |

SD: Standard Deviation

PCS: Physical Component Summary score; MCS: Mental Component Summary score.

SNR: Signal-to-Noise Ratio; MPT: Maximum Phonation Time; OAF: Oral Air Flow; ESP: Estimated Subglottic Pressure at the phonatory threshold; dB: decibels; s: seconds; Hz: Hertz; hPa: hectopascals.

For videolaryngostroboscopy's parameters and GRB scale, 0 (minimum) means normal and 3 (maximum) severe disturbance.  
Due to missing values: VHI at M1 (n=7), SF-36 at M6 and M12 (n=7), vocal range at baseline (n=6), M1 (n=7, n change=5), M6 (n=4, n change=3) and M12 (n change=6), and ESP at each time (n=7).  
<sup>a</sup> Calculated with the mean of right and left vocal folds for each patient.

**eTable 3. Individual patient data of vocal assessment and quality of life**

| Patient n° | Visit | Aerodynamic |      |      | Acoustic |      | GRB scale |   |   | Voice Handicap Index |       |       |       | SF-36 |     |     |     |    |    |     |    |     |      | Videolaryngostroboscopy |    |    |    |    |
|------------|-------|-------------|------|------|----------|------|-----------|---|---|----------------------|-------|-------|-------|-------|-----|-----|-----|----|----|-----|----|-----|------|-------------------------|----|----|----|----|
|            |       | OAF         | ESP  | MPT  | VR       | SNR  | G         | R | B | VHI                  | VHI_F | VHI_P | VHI_E | PF    | SF  | RP  | RE  | MH | VT | BP  | GH | PCS | MCSS | G                       | RR | RL | VR | VL |
| 1          | M0    | 319         | 13,0 | 3,1  | 460      | 21,3 | 2         | 1 | 2 | 85                   | 21    | 27    | 37    | 85    | 38  | 100 | 67  | 24 | 45 | 74  | 77 | 61  | 26   | 2                       | 2  | 1  | 2  | 1  |
| 1          | M1    | 497         | 10,1 | 2,4  | 383      | 9,8  |           |   |   | 84                   | 22    | 27    | 35    |       |     |     |     |    |    |     |    |     |      |                         |    |    |    |    |
| 1          | M6    | 383         | 6,4  | 3,9  | ND       | 19,0 | 2         | 1 | 2 | 92                   | 19    | 33    | 40    | 90    | 63  | 100 | 67  | 20 | 30 | 41  | 52 | 54  | 28   |                         |    |    |    |    |
| 1          | M12   | 157         | 15,7 | 3,8  | 329      | 16,7 | 2         | 0 | 2 | 66                   | 15    | 24    | 27    | 80    | 88  | 100 | 100 | 24 | 20 | 42  | 67 | 50  | 36   | 2                       | 2  | 1  | 3  | 1  |
| 2          | M0    | 203         | 7,9  | 13,2 | 381      | 9,5  | 2         | 2 | 0 | 75                   | 24    | 27    | 24    | 95    | 75  | 100 | 100 | 72 | 65 | 62  | 67 | 51  | 50   | 2                       | 2  | 2  | 2  | 2  |
| 2          | M1    | 243         | 5,6  | 6,9  | 467      | 17,9 |           |   |   | 68                   | 21    | 25    | 22    |       |     |     |     |    |    |     |    |     |      |                         |    |    |    |    |
| 2          | M6    | 244         | 4,7  | 8,0  | ND       | 20,7 | 2         | 2 | 0 | 16                   | 2     | 13    | 1     | ND    | ND  | ND  | ND  | ND | ND | ND  | ND | ND  | ND   |                         |    |    |    |    |
| 2          | M12   | 198         | 7,3  | 7,8  | 460      | 17,7 | 1         | 1 | 0 | 9                    | 2     | 7     | 0     | 100   | 100 | 100 | 100 | 92 | 85 | 100 | 97 | 58  | 58   | 0                       | 0  | 0  | 0  | 0  |
| 3          | M0    | 519         | 11,2 | 6,3  | 474      | 11,9 | 2         | 2 | 2 | 91                   | 26    | 27    | 38    | 90    | 38  | 75  | 33  | 24 | 60 | 41  | 52 | 54  | 26   | 2                       | 1  | 0  | 2  | 0  |
| 3          | M1    | 185         | 11,5 | 3,7  | ND       | 11,7 |           |   |   | 69                   | 21    | 21    | 27    |       |     |     |     |    |    |     |    |     |      |                         |    |    |    |    |
| 3          | M6    | 919         | 16,5 | 3,6  | 413      | 22,0 | 2         | 0 | 2 | 29                   | 4     | 10    | 15    | 100   | 50  | 75  | 33  | 52 | 75 | 22  | 47 | 49  | 36   |                         |    |    |    |    |
| 3          | M12   | 418         | 17,0 | 8,4  | 235      | 18,2 | 3         | 2 | 3 | 31                   | 6     | 14    | 11    | 100   | 50  | 75  | 33  | 64 | 65 | 84  | 47 | 56  | 36   | 1                       | 0  | 2  | 0  | 1  |
| 4          | M0    | 272         | 5,0  | 10,9 | 469      | 17,7 | 2         | 2 | 2 | 73                   | 12    | 31    | 30    | 100   | 100 | 100 | 100 | 92 | 95 | 100 | 92 | 57  | 59   | 2                       | 2  | 1  | 2  | 1  |
| 4          | M1    | 250         | 5,1  | 13,5 | 452      | 19,1 |           |   |   | ND                   | ND    | ND    | ND    |       |     |     |     |    |    |     |    |     |      |                         |    |    |    |    |
| 4          | M6    | 108         | 3,5  | 7,8  | ND       | 23,0 | 2         | 2 | 2 | 72                   | 18    | 33    | 21    | 100   | 50  | 75  | 100 | 56 | 25 | 41  | 82 | 51  | 39   |                         |    |    |    |    |

|   |         |     |          |          |     |          |   |   |   |         |    |    |    |         |         |         |         |         |         |         |         |    |    |   |   |   |   |   |
|---|---------|-----|----------|----------|-----|----------|---|---|---|---------|----|----|----|---------|---------|---------|---------|---------|---------|---------|---------|----|----|---|---|---|---|---|
| 4 | M1<br>2 | 344 | 10,<br>8 | 14,<br>3 | 356 | 16,<br>7 | 2 | 2 | 2 | 43      | 7  | 18 | 18 | 65      | 50      | 75      | 67      | 32      | 45      | 22      | 82      | 47 | 35 | 1 | 0 | 0 | 1 | 0 |
| 5 | M0      | 149 | 5,6      | 22,<br>0 | ND  | 18,<br>2 | 2 | 2 | 1 | 71      | 25 | 30 | 16 | 85      | 75      | 0       | 10<br>0 | 68      | 55      | 62      | 62      | 39 | 52 | 1 | 1 | 0 | 2 | 0 |
| 5 | M1      | 160 | 7,3      | 13,<br>9 | 295 | 14,<br>3 |   |   |   | 62      | 26 | 21 | 15 |         |         |         |         |         |         |         |         |    |    |   |   |   |   |   |
| 5 | M6      | 229 | 10,<br>0 | 14,<br>0 | 414 | 19,<br>0 | 2 | 2 | 1 | 73      | 25 | 30 | 18 | 95      | 63      | 10<br>0 | 10<br>0 | 60      | 55      | 62      | 67      | 53 | 44 |   |   |   |   |   |
| 5 | M1<br>2 | 138 | 5,5      | 13,<br>6 | 381 | 16,<br>2 | 2 | 2 | 1 | 62      | 20 | 25 | 17 | 85      | 88      | 10<br>0 | 10<br>0 | 72      | 60      | 74      | 72      | 51 | 51 | 2 | 3 | 0 | 3 | 0 |
| 6 | M0      | 259 | 7,7      | 5,4      | 286 | 17,<br>0 | 2 | 1 | 2 | 61      | 16 | 30 | 15 | 10<br>0 | 10<br>0 | 10<br>0 | 10<br>0 | 84      | 80      | 10<br>0 | 87      | 57 | 56 | 3 | 2 | 2 | 2 | 2 |
| 6 | M1      | 374 | 6,9      | 9,8      | 456 | 19,<br>7 |   |   |   | 5       | 0  | 5  | 0  |         |         |         |         |         |         |         |         |    |    |   |   |   |   |   |
| 6 | M6      | 305 | 8,4      | 5,0      | 538 | 16,<br>7 | 2 | 1 | 2 | 12      | 6  | 4  | 2  | 10<br>0 | 57 | 62 |   |   |   |   |   |
| 6 | M1<br>2 | 348 | 5,0      | 8,6      | 381 | 21,<br>1 | 1 | 1 | 1 | 2       | 0  | 2  | 0  | 10<br>0 | 57 | 62 | 0 | 0 | 0 | 0 | 0 |
| 7 | M0      | 344 | 5,3      | 8,3      | 209 | 11,<br>1 | 3 | 3 | 3 | 10<br>7 | 30 | 39 | 38 | 61      | 38      | 10<br>0 | 10<br>0 | 16      | 70      | 41      | 31      | 46 | 35 | 0 | 0 | 1 | 0 | 1 |
| 7 | M1      | 382 | 8,0      | 11,<br>0 | 593 | 10,<br>8 |   |   |   | 64      | 17 | 22 | 25 |         |         |         |         |         |         |         |         |    |    |   |   |   |   |   |
| 7 | M6      | 323 | 8,2      | 7,3      | 316 | 15,<br>8 | 3 | 3 | 3 | 60      | 18 | 22 | 20 | 72      | 63      | 10<br>0 | 0       | 40      | 40      | 62      | 37      | 53 | 26 |   |   |   |   |   |
| 7 | M1<br>2 | 322 | 9,3      | 9,6      | 369 | 18,<br>1 | 3 | 3 | 3 | 80      | 26 | 28 | 26 | 75      | 63      | 10<br>0 | 67      | 56      | 55      | 51      | N<br>D  | ND | ND | 2 | 2 | 2 | 2 | 2 |
| 8 | M0      | 355 | ND       | 16,<br>0 | ND  | 14,<br>8 | 2 | 2 | 0 | 73      | 24 | 31 | 18 | 90      | 88      | 25      | 67      | 80      | 65      | 10<br>0 | 67      | 48 | 51 | 1 | 2 | 0 | 2 | 0 |
| 8 | M1      | 289 | 7,0      | 21,<br>0 | 561 | 12,<br>4 |   |   |   | 40      | 11 | 19 | 10 |         |         |         |         |         |         |         |         |    |    |   |   |   |   |   |
| 8 | M6      | 242 | 6,7      | 19,<br>4 | ND  | 16,<br>6 | 1 | 1 | 1 | 31      | 7  | 16 | 8  | 10<br>0 | 75      | 75      | 10<br>0 | 64      | 35      | 84      | 57      | 52 | 44 |   |   |   |   |   |
| 8 | M1<br>2 | 330 | 5,8      | 19,<br>0 | 518 | 18,<br>0 | 0 | 0 | 0 | 22      | 5  | 11 | 6  | 10<br>0 | 88      | 75      | 10<br>0 | 60      | 55      | 10<br>0 | 72      | 56 | 46 | 0 | 2 | 0 | 2 | 0 |

Aerodynamic analysis: OAF: oral airflow, ESP: estimated subglottic pressure, MPT: maximum phonation time; Acoustic analysis: VR: Vocal Range, SNR: signal-to-noise ratio; GRB scale: G: Global grade, R:



Roughness, B: Breathiness; VHI: Voice Handicap Index, VHI\_F: functional subscale score, VHI\_P: physical subscale score, VHI\_E: emotional subscale score; SF-36: PF: Physical Function, SF: Social Function, RP: Role limitations due to physical health problems, RE: Role limitations due to emotional problems, MH: Emotional Well-being, VT: Vitality, BP: Bodily Pain, GH: General Health Perception, PCS: Physical Component Summary score, MCS: Mental Component Summary score; Videolaryngostroboscopy: G: Glottal closure, RR: Regularity of Right vocal fold, RL: Regularity of Left vocal fold, VR: Vibration of Right vocal fold, VL: Vibration of Left vocal fold

## REFERENCES

1. Jacobson B, Johnson A, Grywalski C et al. The Voice Handicap Index (VHI): development and validation. *Am J Speech Lang Pathol.* 1997;6:66–70.
2. Ware JE, Kosinski M, Gandek B. SF-36 ® Health Survey: Manual & Interpretation Guide. Lincoln, RI: QualityMetric Incorporated;1993; 2000.
3. Ware JE, Kosinski M, Keller SD. SF-36 Physical and Mental Health Summary Scales: A User’s Manual. Boston, MA: The Health Institute; 1994.
